# Supplementary material
Source: publisher figshare collection journal article supplement (https://plos.figshare.com/articles/dataset/_/5460121)
Supplement: Supplementary file [file 1]

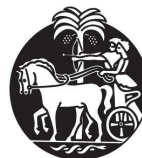

**Observational / Interventions Research Ethics Committee**

Prof Alison Elliott  
 Professor  
 Department of Clinical Research (CRD)  
 LSHTM

23 June 2015 23 June 2015

Dear Prof Elliott ,

**Study Title:** Community perceptions about interventions to control schistosomiasis in Koome sub-county, Mukono district

**LSHTM ethics ref:** 10109

Thank you for your application for the above research, which has now been considered by the Observational Committee.

**Confirmation of ethical opinion**

On behalf of the Committee, I am pleased to confirm a favourable ethical opinion for the above research on the basis described in the application form, protocol and supporting documentation, subject to the conditions specified below.

**Conditions of the favourable opinion**

Approval is dependent on local ethical approval having been received, where relevant.

**Approved documents**

The final list of documents reviewed and approved by the Committee is as follows:

| Document Type       | File Name                                                                                     | Date       | Version |
|---------------------|-----------------------------------------------------------------------------------------------|------------|---------|
| Protocol / Proposal | LaVIISWA Social Sciences Study version 1                                                      | 07/04/2015 | 1       |
| Information Sheet   | 1. LaVIISWA social science substudy consent form_indepth interviews_English_v2_May 2015       | 11/05/2015 | 2       |
| Information Sheet   | 1. LaVIISWA social science substudy consent form_indepth interviews_Luganda_v2_May 2015       | 11/05/2015 | 2       |
| Information Sheet   | 2. LaVIISWA social science substudy consent form_key informant interviews_English_v2_May 2015 | 11/05/2015 | 2       |
| Information Sheet   | 2. LaVIISWA social science substudy consent form_key informant interviews_Luganda_v2_May 2015 | 11/05/2015 | 2       |
| Information Sheet   | 3. LaVIISWA social science substudy consent form_focus group discussions_English_v2_May 2015  | 11/05/2015 | 2       |
| Information Sheet   | 3. LaVIISWA social science substudy consent form_focus group discussions_Luganda_v2_May 2015  | 11/05/2015 | 2       |
| Local Approval      | scan0354                                                                                      | 26/05/2015 | n/a     |
| Investigator CV     | CV, short, Alison Elliott                                                                     | 31/05/2015 | n/a     |

**After ethical review**

The Chief Investigator (CI) or delegate is responsible for informing the ethics committee of any subsequent changes to the application. These must be submitted to the Committee for review using an Amendment form. Amendments must not be initiated before receipt of written favourable opinion from the committee.

The CI or delegate is also required to notify the ethics committee of any protocol violations and/or Suspected Unexpected Serious Adverse Reactions (SUSARs) which occur during the project by submitting a Serious Adverse Event form.

At the end of the study, the CI or delegate must notify the committee using an End of Study form.

All aforementioned forms are available on the ethics online applications website and can only be submitted to the committee via the website at: <http://leo.lshtm.ac.uk>

Additional information is available at: [www.lshtm.ac.uk/ethics](http://www.lshtm.ac.uk/ethics)

Yours sincerely,



**Professor John DH Porter**  
**Chair**

[ethics@lshtm.ac.uk](mailto:ethics@lshtm.ac.uk)

<http://www.lshtm.ac.uk/ethics/>

---

**Improving health worldwide**
