# Supplementary material
Source: publisher figshare collection journal article supplement (https://plos.figshare.com/articles/dataset/_/5460121)
Supplement: Supplementary file [file 1]

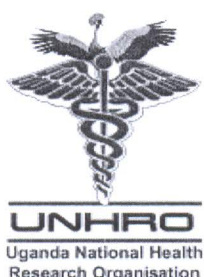

## Uganda Virus Research Institute

Plot 51-59, Nakiwogo Road, Entebbe  
P.O. Box 49, Entebbe-Uganda  
Tel: +256 414 320 385 / 6  
Fax: +256 414 320 483  
Email: [directoruvri@uvri.go.ug](mailto:directoruvri@uvri.go.ug)

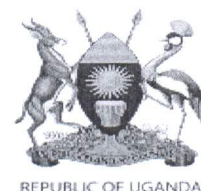

Our Ref: GC/127/15/05/510

26<sup>th</sup> May 2015

Your Ref: .....

Dr. Richard Edwin Sanya,

RE: UVRI REC review of protocol titled **“Community perceptions about interventions to control schistosomiasis in Koome sub-county, Mukono district Version 1.0, 7<sup>th</sup> April 2015.”**

Thank you for submitting the above Protocol dated 10<sup>th</sup> April 2015 to UVRI Research Ethics Committee.

This is to inform you that your protocol was reviewed and met the requirements of the UVRI REC.

UVRI REC annual approval has been given for you to conduct your research up to 04<sup>th</sup> May 2016. Annual progress report and request for extension should be submitted to UVRI REC prior to the expiry date, to allow timely review.

The reviewed and approved documents included;

1. UVRI REC Application form
2. Study Proposal version 1.0, 7<sup>th</sup> April 2015
3. Consent forms
4. Applicant's CVs

You can now continue with your study after registration with the Uganda National Council for Science and Technology (UNCST).

**Note:** UVRI REC requires you to submit a copy of the UNCST approval letter for the above study before commencement.

Yours sincerely,

Dr. Alice Namale

**Vice Chair, UVRI REC**

C.C The Director-UVRI,  
Secretary, UVRI REC
